# Supplementary material
Source: publisher site journal article supplement (https://www.dovepress.com/article/248139)
Supplement: Supplementary file 1 [file get_supplementary_file.php]

**S-Table 1** Differences of spirometric parameters between subjects correctly diagnosed and misdiagnosed by questionnaires

|  | COPD without OSA | | | | Overlap Syndrome | | | | |
| --- | --- | --- | --- | --- | --- | --- | --- | --- | --- |
|  | TN Group | FP Group | P value | | TP Group | | FN Group | P value | |
| BQ | | | | | |
| FEV1/FVC (%) | 62.53 (49.28, 66.66) | 69.51 (69.04, 69.99) | 0.0030a | | 64.31 (58.27, 67.50) | | 65.17(57.70, 66.65) | 0.6980 | |
| FEV1%pred | 58.77±17.14 | 83.50±16.01 | 0.0015a | | 60.84±18.65 | | 65.83±20.52 | 0.3204 | |
| FVC%pred | 76.53±13.52 | 88.53±10.97 | 0.0420a | | 73.93±16.82 | | 82.49±17.88 | 0.0571b | |
| MBQ | | | | | |
| FEV1/FVC (%) | 60.49 (49.06, 66.74) | 69.19 (67.63, 69.83) | 0.0046a | | 64.70 (57.99, 67.15) | | 67.68 (56.83, 67.68) | 0.9180 | |
| FEV1%pred | 58.66±17.50 | 77.95±17.00 | 0.0056a | | 60.54±17.55 | | 67.96±22.38 | 0.1544 | |
| FVC%pred | 76.76±13.77 | 84.24±12.23 | 0.1771 | | 74.26±16.30 | | 86.61±19.47 | 0.0092b | |
| STOP-Bang score | | | | | |
| FEV1/FVC (%) | 60.49 (49.28, 66.33) | 66.65 (52.05, 69.32) | 0.1151 | 64.08 (57.67, 66.89) | | | 66.78 (58.54, 67.86) | | 0.2838 | |
| FEV1%pred | 57.18±17.28 | 67.84±19.04 | 0.0373a | | 61.09±17.97 | | 74.00±24.60 | 0.0239b | |
| FVC%pred | 74.68±12.86 | 82.50±13.87 | 0.0380a | | 76.25±16.84 | | 91.30±21.44 | 0.0255b | |

**Notes:** Data was presented as mean±SD or median (IQR). a, b Significant difference between: a TN group and FP group, or b TP group and FN group.

**Abbreviations:** TN, Ture Negative; FP, False Positive; TP, Ture Positive; FN, False Negative; COPD, chronic obstructive pulmonary disease; OSA, obstructive sleep apnea syndrome; BQ, Berlin Questionnaire; MBQ, modified Berlin Questionnaire; FEV1/FVC, forced expiratory volume in 1 second and forced vital capacity ratio; FEV1%pred, predicted forced expiratory volume in 1 second; FVC%pred, predicted forced vital capacity ratio.

**S-Table 2** Berlin, modified Berlin questionnaire and STOP-Bang scores were correlated with pulmonary function parameters

|  | Whole Group  n= 116 | | COPD without OSA  n= 54 | | Overlap Syndrome  n=62 | |
| --- | --- | --- | --- | --- | --- | --- |
|  | r | P value | r | P value | r | P value |
| BQ score | | | | | | |
| FEV1/FVC (%) | 0.1649 | 0.0768 | 0.3092 | 0.0229a | 0.0182 | 0.8886 |
| FEV1%pred | 0.0324 | 0.7302 | 0.3236 | 0.0170a | -0.2447 | 0.0552 |
| FVC%pred | -0.0921 | 0.3276 | 0.2690 | 0.0492a | -0.3476 | 0.0061a |
| MBQ score | | | | | | |
| FEV1/FVC (%) | 0.1897 | 0.0414b | 0.3205 | 0.0070b | 0.0007 | 0.9955 |
| FEV1%pred | 0.0719 | 0.4432 | 0.3919 | 0.0034b | -0.1715 | 0.0826 |
| FVC%pred | -0.1021 | 0.2776 | 0.2069 | 0.1333 | -0.3250 | 0.0106b |
| STOP-Bang score | | | | | | |
| FEV1/FVC (%) | 0.1105 | 0.2377 | 0.1910 | 0.1666 | -0.0096 | 0.9408 |
| FEV1%pred | -0.0411 | 0.6615 | 0.3002 | 0.0274c | -0.3421 | 0.0065c |
| FVC%pred | -0.0846 | 0.3688 | 0.3288 | 0.0152c | -0.3756 | 0.0029c |

**Notes: a** Significant correlation between pulmonary function parameters and BQ score, b significant correlation between pulmonary function parameters and MBQ score, c significant correlation between pulmonary function parameters and STOP-Bang score.

**Abbreviations:** r, correlation coefficient; COPD, chronic obstructive pulmonary disease; OSA, obstructive sleep apnea syndrome; BQ, Berlin Questionnaire; MBQ, modified Berlin Questionnaire; FEV1/FVC, forced expiratory volume in 1 second and forced vital capacity ratio; FEV1%pred,

percentage of predicted forced expiratory volume in 1 second; FVC%pred, percentage of predicted forced vital capacity ratio.
